# Supplementary material
Source: Springer Nature journal article supplement (https://www.springermedizin.de/resource/supplementary/12913_2013_3412_MOESM4_ESM.pdf/9532744)

**a**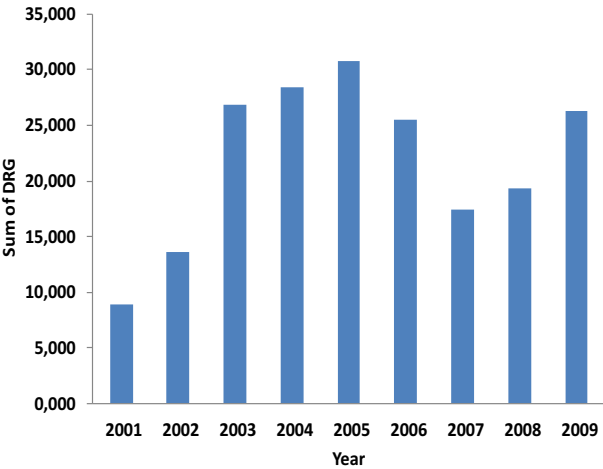**b**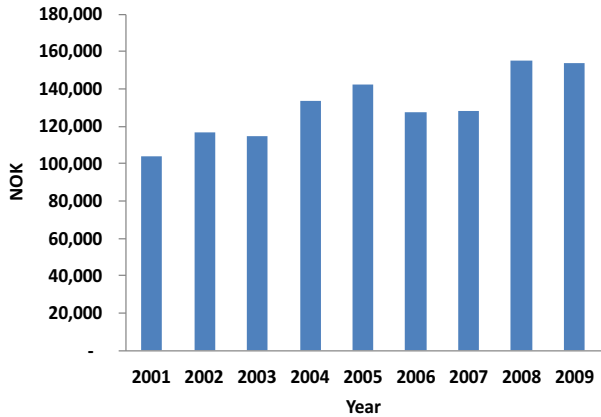

Supplement: MOESM4 [file 9532744]
